# Supplementary material for: Loss of imprinting of the Igf2-H19 ICR1 enhances placental endocrine capacity via sex-specific alterations in signalling pathways in the mouse
Source: Oxford University Press journal article supplement (doi:10.1242/dev.199811), 2022-01-01
Supplement: dev199811supp.pdf [file dev199811supp.pdf]

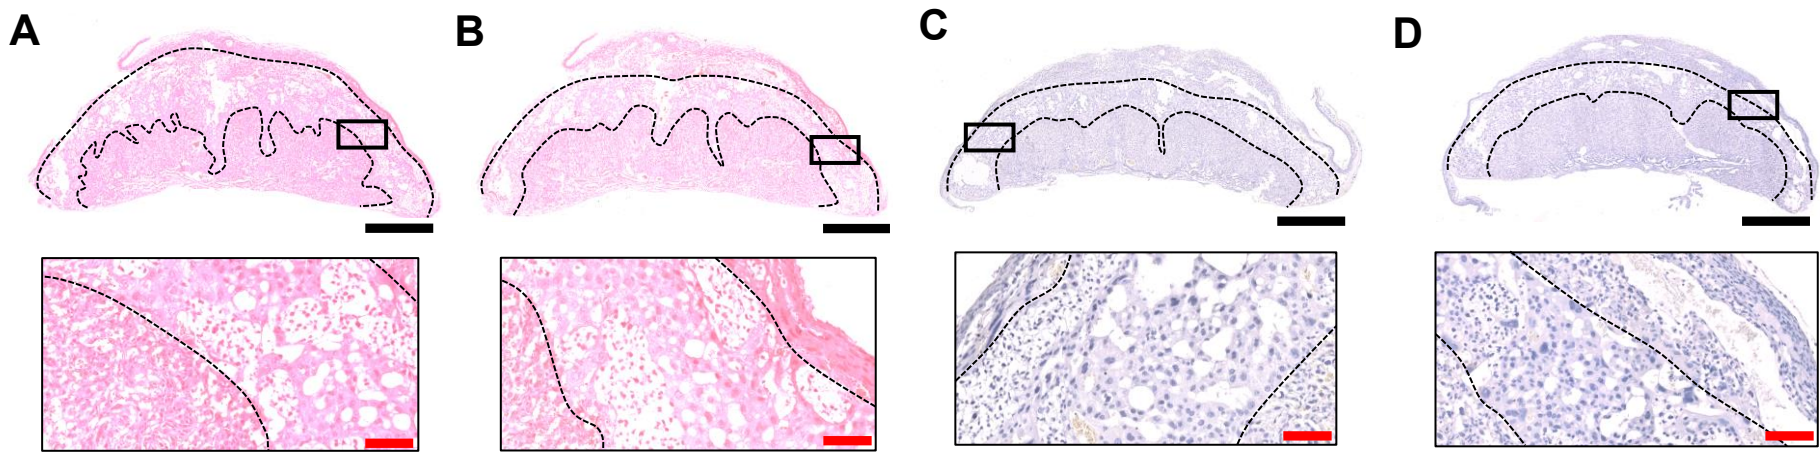

**Fig. S1. Negative controls for *in situ* hybridization and immunohistochemistry experiments in D16 mouse placentas.** Sense *in situ* hybridization probes for (A) *H19* and (B) *Psg23*. Secondary antibody only control used in immunohistochemistry experiments for (C) cleaved caspase-3 and (D) Ki67. Black boxes represent the area magnified in the image below. Black bar represents 1 mm. Red bar represents 100  $\mu$ m.

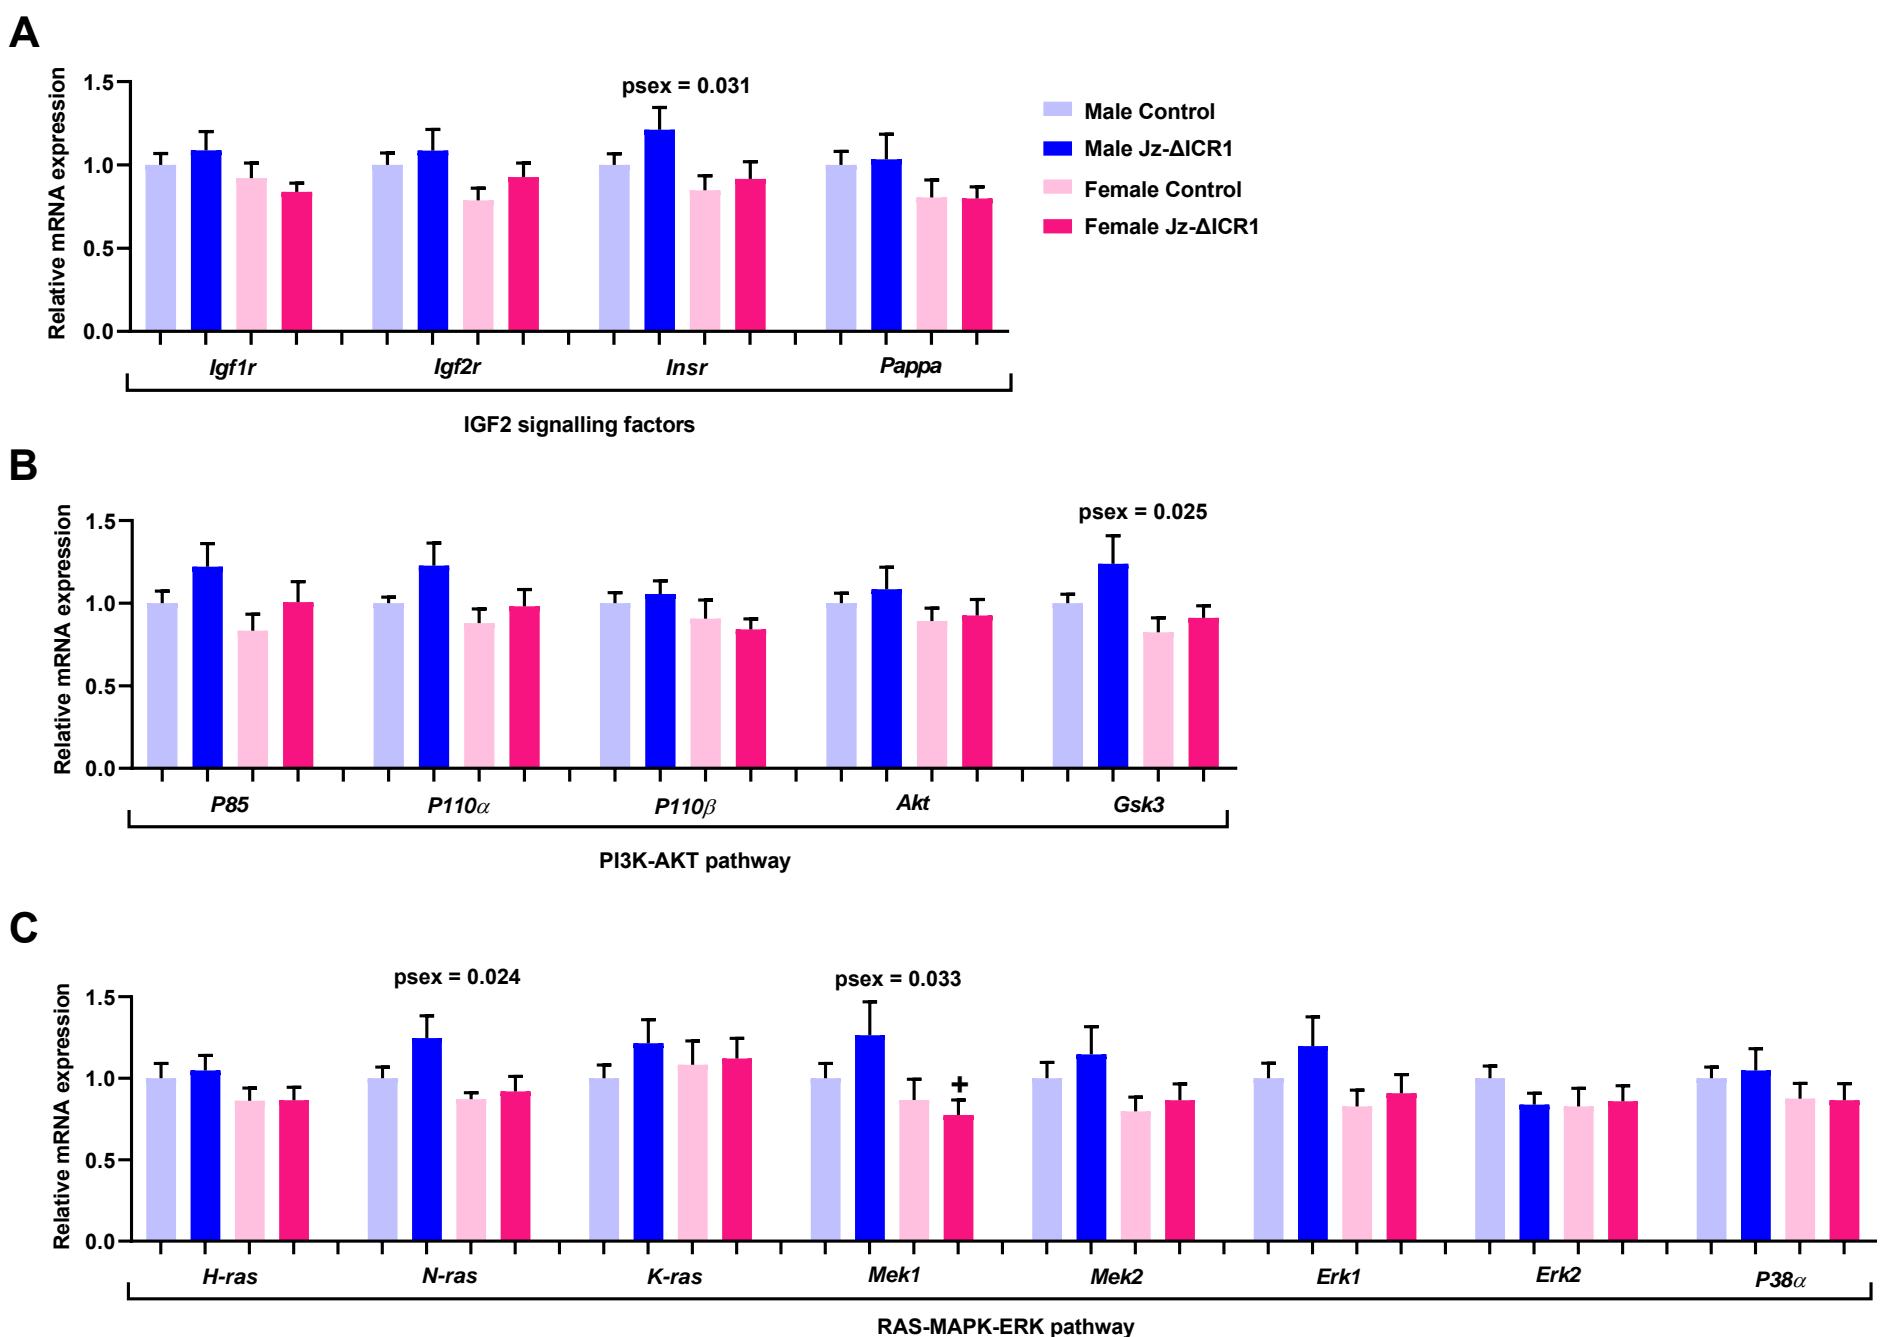

**Fig. S2. Jz- $\Delta$ ICR1 does not alter the gene expression of IGF2 signalling factors or downstream members of the PI3K-AKT and MAPK pathways.** Expression of (A) IGF2 signalling factors, (B) PI3K-AKT pathway genes and (C) RAS-MAPK-ERK pathway genes in Jz samples relative to the geometric mean of housekeeping genes (*Hprt* and *Ywhaz*) using qPCR (n = 8-10 per genotype/sex, across 11 litters). Data were obtained on D16. Values presented as mean + SEM with significance assessed by two-way ANOVA and pairwise T-test (psex < 0.05 = +).

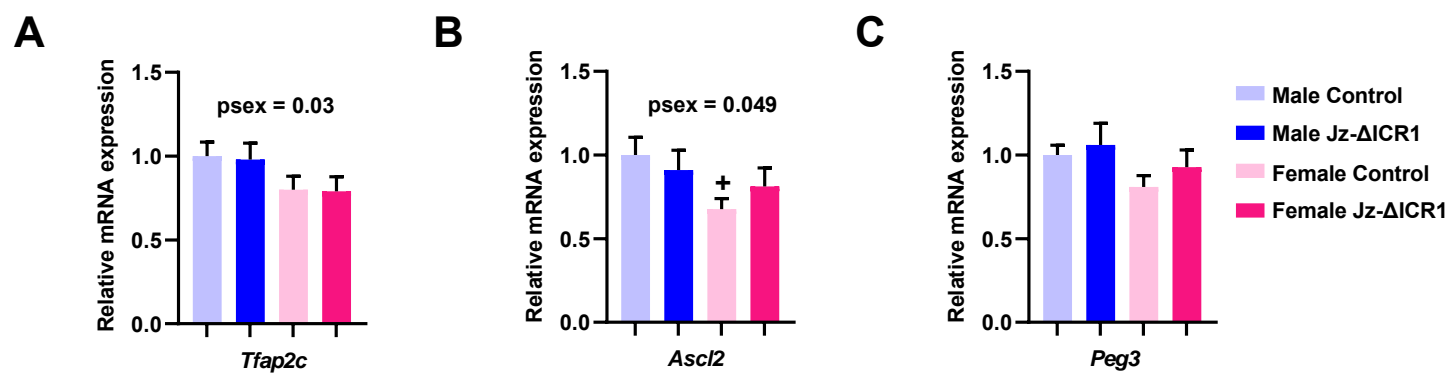

**Fig. S3. Jz-ΔICR1 does not alter the gene expression of *Tfap2c*, *Ascl2* or *Peg3*.** Expression of (A) *Tfap2c*, (B) *Ascl2* and (C) *Peg3* in Jz samples relative to the geometric mean of housekeeping genes (*Hprt* and *Ywhaz*) using qPCR (n = 9-10 per genotype/sex, across 11 litters). Data were obtained on D16. Values presented as mean + SEM with significance assessed by two-way ANOVA and pairwise T-test (psex < 0.05 = +).

Fig. S4.

A

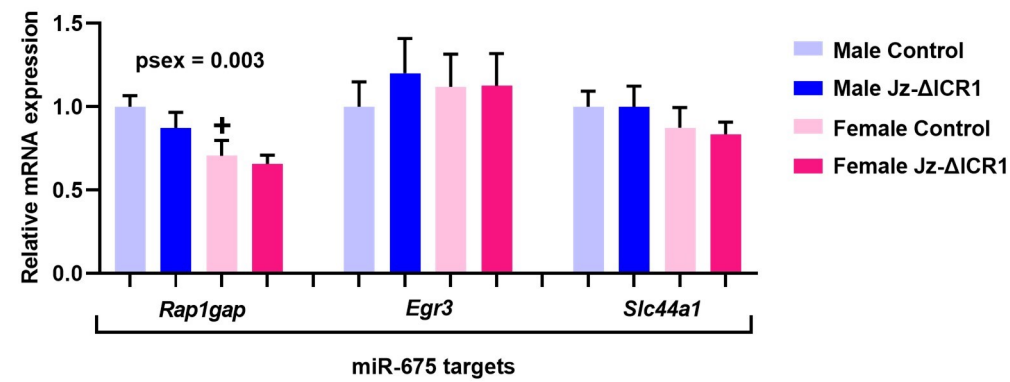

**Fig. S4. Jz-ΔICR1 does not alter the gene expression of miR-675 targets.** (A) Expression of miR-675 target genes in Jz samples relative to the geometric mean of housekeeping genes (*Hprt* and *Ywhaz*) using qPCR (n = 8-10 per genotype/sex, across 11 litters). Data were obtained on D16. Values presented as mean + SEM with significance assessed by two-way ANOVA and pairwise T-test (psex < 0.05 = +).

A

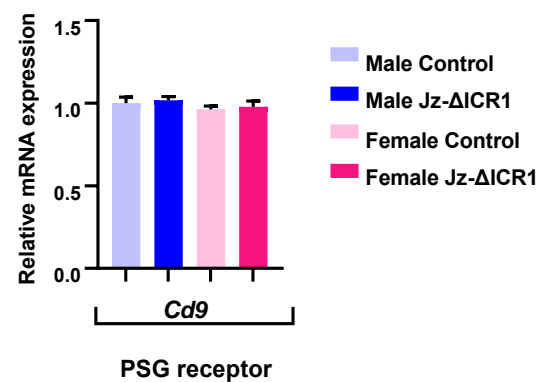

**Fig. S5. Jz-ΔICR1 did not alter the expression of the PSG receptor Cd9 in the Lz.** (A) Expression *Cd9* in in Lz samples relative to the geometric mean of housekeeping genes (*Hprt* and *Polr2a*) with Jz-ICR1Δ using qPCR (n = 9-10 per genotype/sex, across 11 litters). Data were obtained on D16. Values presented as mean + SEM with significance assessed by two-way ANOVA.

**Table S1. The effect of Jz-ΔICR1 on conceptus weight, placental volume and the proportion of cell types within the Jz and Db of D16 mouse placentas in males and females.**

|                                             | Male             |                     | Female           |                      | Overall P Values |        |             |
|---------------------------------------------|------------------|---------------------|------------------|----------------------|------------------|--------|-------------|
|                                             | Control          | Jz-ΔICR1            | Control          | Jz-ΔICR1             | Genotype         | Sex    | Interaction |
| Fetal weight (mg)                           | 420.4 ± 8.4      | 429.1 ± 11.8        | 407.5 ± 12.7     | 412.3 ± 14.2         | 0.6646           | 0.1667 | 0.7708      |
| Placental weight (mg)                       | 123.1 ± 4.0      | 120.7 ± 3.2         | 108.2 ± 4.6 †    | 110.8 ± 4.3          | 0.9560           | 0.0008 | 0.7987      |
| Fetal:placental weight ratio                | 3.5 ± 0.1        | 3.5 ± 0.1           | 3.8 ± 0.2        | 3.8 ± 0.1            | 0.8413           | 0.0198 | 0.7029      |
| Db volume (mm <sup>3</sup> )                | 18.9 ± 1.1       | 14.3 ± 1.0 *        | 15.7 ± 0.5       | 15.5 ± 0.7           | 0.0104           | 0.2645 | 0.0679      |
| Jz volume (mm <sup>3</sup> )                | 45.0 ± 2.3       | 54.1 ± 2.9          | 33.9 ± 2.9 †     | 48.1 ± 1.7 *         | <0.0001          | 0.0018 | 0.3148      |
| Lz volume (mm <sup>3</sup> )                | 52.1 ± 2.4       | 46.3 ± 1.9          | 47.4 ± 1.1       | 44.4 ± 1.3           | 0.0179           | 0.0680 | 0.4417      |
| Jz SpT volume (mm <sup>3</sup> )            | 27.5 ± 0.9       | 33.4 ± 1.2 *        | 22.3 ± 1.7 †     | 29.7 ± 1.2 *         | <0.0001          | 0.0016 | 0.5768      |
| Jz GC volume (mm <sup>3</sup> )             | 15.8 ± 1.4       | 18.5 ± 1.8          | 10.6 ± 1.2       | 16 ± 1.0 *           | 0.0065           | 0.0091 | 0.3494      |
| Jz TGC volume (mm <sup>3</sup> )            | 1.8 ± 0.2        | 2.2 ± 0.3           | 1.0 ± 0.2        | 2.0 ± 0.2 *          | 0.0077           | 0.0649 | 0.2109      |
| Db S volume (mm <sup>3</sup> )              | 11.6 ± 0.6       | 8.5 ± 0.5 *         | 10.2 ± 0.6       | 11.1 ± 0.8 †         | 0.3655           | 0.0800 | 0.0034      |
| Db GC volume (mm <sup>3</sup> )             | 6.2 ± 0.5        | 5.0 ± 0.5           | 4.7 ± 0.2        | 4.8 ± 0.5            | 0.2235           | 0.0718 | 0.1724      |
| Db V volume (mm <sup>3</sup> )              | 1.0 ± 0.2        | 0.9 ± 0.2           | 0.8 ± 0.3        | 0.8 ± 0.2            | 0.5724           | 0.4757 | 0.7436      |
| Jz GC / Jz SpT                              | 0.57 ± 0.04      | 0.55 ± 0.04         | 0.48 ± 0.04      | 0.55 ± 0.04          | 0.5264           | 0.2328 | 0.2640      |
| Db GC / Jz GC                               | 0.42 ± 0.05      | 0.29 ± 0.02         | 0.49 ± 0.06      | 0.31 ± 0.04 *        | 0.0037           | 0.3990 | 0.6375      |
| Db GC / (Jz GC + Db GC)                     | 0.29 ± 0.03      | 0.22 ± 0.02         | 0.32 ± 0.03      | 0.23 ± 0.02 *        | 0.0044           | 0.4158 | 0.7247      |
| Average Jz SpT cell size (μm <sup>2</sup> ) | 308.3 ± 18.4     | 288.7 ± 17.8        | 305.5 ± 15.5     | 294.4 ± 20.5         | 0.4151           | 0.9379 | 0.8192      |
| Average Jz GC cell size (μm <sup>2</sup> )  | 211.6 ± 20.9     | 211.4 ± 14.8        | 174.2 ± 15.7     | 186.6 ± 18.7         | 0.7357           | 0.1041 | 0.7292      |
| Average number of Jz SpT                    | 91917.9 ± 7033.4 | 123267.1 ± 3010.1 * | 70356.7 ± 9146.4 | 101629.7 ± 6729.3 *† | 0.0006           | 0.0083 | 0.9957      |
| Average number of Jz GC                     | 76471.8 ± 7866.7 | 100092.8 ± 13213.5  | 60704.5 ± 7437.7 | 99236.4 ± 11529.4 *  | 0.0107           | 0.4356 | 0.4832      |

Weight data displayed for males (Control n = 29 and Jz-ΔICR1 n = 27, from individual pups across 13 litters) and females (Control n = 17 and Jz-ΔICR1 n = 27, from individual pups across 13 litters). Control:Jz-ΔICR1 male = 52:48 and female = Control:Jz-ΔICR1 = 39:61. Volume data: n = 8 per sex/genotype, across 7 litters. Cell size data: n = 4 per sex/genotype, across 4 litters. Values presented as mean ± SEM with significance assessed by two-way ANOVA and pairwise T-test (p<sub>genotype</sub> < 0.05 = \*, p<sub>sex</sub> < 0.05 = †). Decidua (Db), Junctional zone (Jz), Labyrinth zone (Lz), Jz spongiotrophoblasts (Jz SpT), Jz glycogen cells (Jz GC), Jz trophoblast giant cell (Jz TGC), Db stroma (Db S), Db glycogen cell (Db GC) and Db vessel (Db V).

**Table S2. QPCR primers with references for those previously published.**

| Gene           | Forward                | Reverse                | Product size (bp) | Reference            |
|----------------|------------------------|------------------------|-------------------|----------------------|
| <i>Ascl2</i>   | GAGCAGGAGCTGCTTGACTT   | CAGTCAGCACTTGGCATTG    | 176               | Tunster et al., 2010 |
| <i>Cd9</i>     | GCTGGGATTGTCTTCGGGT    | GGGTTTCATCCTTGCTCCGTA  | 151               |                      |
| <i>Flt1</i>    | AAAGGCTGAGCATCACTCCC   | GGACTCCCTGCATCACTAACAA | 190               |                      |
| <i>Gbe1</i>    | GGACGCTGAGATGTACACGA   | AGTCCAACCATTGAGGATGC   | 167               | Tunster et al., 2010 |
| <i>Gys1</i>    | GGAGAAATTTGGGAGGAAGC   | GTCAAGATGGGGTCTGAGGA   | 183               | Tunster et al., 2010 |
| <i>H19</i>     | CATTCTAGGCTGGGGTCAAA   | GCCCTTCTTTTCCATTCTCC   | 172               | Keniry et al., 2012  |
| <i>Hsd11b1</i> | GAGGAAGGTCTCCAGAAGTA   | ATGTCCAGTCCGCCCAT      | 143               | Chin et al., 2017    |
| <i>Hsd11b2</i> | GGCTGGATCGCGTTGTC      | CGTGAAGCCCATGGCAT      | 132               | Chin et al., 2017    |
| <i>Pappa</i>   | TGCAATAGGTCAGAGTGTGC   | GGGTATGTCACGCACTGTCA   | 91                |                      |
| <i>Pcdh12</i>  | GCCTGGTTAGGCTCTCTGTG   | TTATTTCCCTCGGTGGTTTGG  | 151               | Tunster et al., 2010 |
| <i>Peg3</i>    | AGCACATCCCCTGTACGAA    | TCTGCATTTGACCCCTGGAT   | 190               |                      |
| <i>Polr2a</i>  | CACTGTCATCACCCCTGACC   | ATACTGGCTGTTTCCCTGTC   | 148               |                      |
| <i>Prl6a1</i>  | CTTACTGCCTGCCACACATC   | CTCCAAGCTGTCAACATACTGA | 114               |                      |
| <i>Prl7b1</i>  | CAGCACATCAATAGCCTTGC   | TTGGTGATTTGAGTGGCAA    | 160               | Tunster et al., 2016 |
| <i>Rapgap1</i> | CTGCAACTTCCGCAACAAGG   | ATGTGTTCCCGATATGCCG    | 108               |                      |
| <i>Slc2a1</i>  | GCTTATGGGCTTCTCCAACT   | GGTGACACCTCTCCACATAC   | 123               | Xu et al., 2015      |
| <i>Slc2a3</i>  | GATCGGCTCTTCCAGTTTG    | CAATCATGCCACCAACAGAG   | 176               | Tunster et al., 2010 |
| <i>Slc38a1</i> | CCTTCACAAGTACCAGAGCAC  | GGCCAGCTCAAATAACGATGAT | 127               | Chen et al., 2015    |
| <i>Slc38a2</i> | TAATCTGAGCAATGCGATTGTG | AGATGGACGGAGTATAGCGAAA | 129               | Chen et al., 2015    |
|                | G                      | A                      |                   |                      |
| <i>Slc38a4</i> | GCGGGGACAGTATTCAGGAC   | GGAACTTCTGACTTTCGGCAT  | 102               | Chen et al., 2015    |
| <i>Slc44a1</i> | TCCGCCGCGCAGAGC        | TCTTGTCTGTCACCTGTTG    | 147               |                      |
| <i>Tfap2c</i>  | CCTGCTCAGCTCCACGTC     | CCTCCATTTTGGACTTTGC    | 129               |                      |
| <i>Ugp2</i>    | CTGGTGAAATCGCTCAAGT    | TTACATTCAGGCCTCCATCC   | 187               | Tunster et al., 2010 |
| <i>Vegfa</i>   | GAAGCTACTGCCGTCGATT    | CTTCATCGTTACAGCAGCC    | 126               |                      |

**Table S3. Primary antibodies used for protein expression analysis**

| Primary antibody             | Species | Manufacturer    | Catalogue number | Dilution         | Incubation time        |
|------------------------------|---------|-----------------|------------------|------------------|------------------------|
| Igf1r                        | Rabbit  | Santa Cruz      | sc-713           | 1:1000           | 1 O/N at 4°C, 2h at RT |
| Igf2r                        | Rabbit  | Cell Signalling | 15128            | 1:2000           | 1 O/N at 4°C, 2h at RT |
| Insr                         | Rabbit  | Santa Cruz      | sc-711           | 1:400            | 1 O/N at 4°C, 2h at RT |
| P85                          | Rabbit  | Milipore        | 06-195           | 1:1000 in 5% BSA | 2h at RT               |
| P110α                        | Rabbit  | Cell Signalling | 4249             | 1:1000           | 1 O/N at 4°C, 2h at RT |
| P110β                        | Rabbit  | Cell Signalling | 3011             | 1:1000           | 1 O/N at 4°C, 3h at RT |
| pAkt Ser473                  | Rabbit  | Cell Signalling | 9271             | 1:500            | 1 O/N at 4°C, 3h at RT |
| T-Akt                        | Rabbit  | Cell Signalling | 9272             | 1:1000           | 1 O/N at 4°C, 2h at RT |
| pGsk3 Ser21/9                | Rabbit  | Cell Signalling | 9331             | 1:1000           | 1 O/N at 4°C, 1h at RT |
| T-Gsk3                       | Rabbit  | Cell Signalling | 9315             | 1:1000           | 1 O/N at 4°C, 1h at RT |
| pP38                         | Rabbit  | Cell Signalling | 4511             | 1:1000           | 1 O/N at 4°C, 1h at RT |
| T-P38                        | Rabbit  | Cell Signalling | 8690             | 1:1000           | 1 O/N at 4°C, 1h at RT |
| pMapk Thr202/Tyr204 (Erk1/2) | Rabbit  | Cell Signalling | 4370             | 1:1000           | 1 O/N at 4°C, 2h at RT |
| T-Mapk (Erk1/2)              | Rabbit  | Cell Signalling | 4695             | 1:1000           | 1 O/N at 4°C, 2h at RT |

Abbreviations: O/N = overnight, RT = room temperature.

## Supplementary reference list

**Chen, S., Sun, F.Z., Huang, X., Wang, X., Tang, N., Zhu, B. and Li, B.** (2015). Assisted reproduction causes placental maldevelopment and dysfunction linked to reduced fetal weight in mice. *Scientific reports*. **5**, 1-15.

**Chin, E.H., Schmidt, K.L., Martel, K.M., Wong, C.K., Hamden, J.E., Gibson, W.T., Soma, K.K. and Christians, J.K.** (2017). A maternal high-fat, high-sucrose diet has sex-specific effects on fetal glucocorticoids with little consequence for offspring metabolism and voluntary locomotor activity in mice. *PLoS One*. **12**, p.e0174030.

**Tunster, S.J., Tycko, B. and John, R.M.** (2010). The imprinted Phlda2 gene regulates extraembryonic energy stores. *Molecular and cellular biology*. **30**, 295-306.

**Xu, W., Barrientos, T., Mao, L., Rockman, H.A., Sauve, A.A. and Andrews, N.C.** (2015). Lethal cardiomyopathy in mice lacking transferrin receptor in the heart. *Cell reports*. **13**, 533-545
